# Supplementary material for: A New Role of the Mosquito Complement-like Cascade in Male Fertility in Anopheles gambiae
Source: PLoS Biol. 2015 Sep 22;13(9):e1002255. doi: 10.1371/journal.pbio.1002255 (PMC4579081; doi:10.1371/journal.pbio.1002255)
Supplement: S1 Data — (XLSX) [file pbio.1002255.s001.xlsx]

## Sheet: Fig. 1F
		number of testes positive for		Percent of positive (%)		standard deviation (%)
day post mating	nb of analysed testes	spermatogonia	spermatozoa	spermatogonia	spermatozoa	spermatogonia	spermatozoa
1	31	13	0	42	0	8.9	0
3	30	3	10	10	33	5.5	8.6
5	30	6	21	20	70	7.4	8.4
7	30	0	26	0	86	0	6.3
9	32	0	24	0	75	0	7.7
13	30	0	26	0	86	0	6.3

## Sheet: Fig. 1G
		number of testes positive for		Percent of positive (%)		standard deviation (%)
Mating status	nb of analysed testes	spermatogonia	spermatozoa	spermatogonia	spermatozoa	spermatogonia	spermatozoa
Virgin	30	23	0	0	76	0	7.8
Mated	31	24	7	22	77	7.4	7.6

## Sheet: Fig. 2A&B
radiation (Gy)	sample id	egg nb	larvae	Hatching rate
100	1	101	4	0.039604					egg nb		Hatching rate (%)
100	2	68	5	0.0735294			radiation (Gy)	N	average	sem	average	sem
100	3	85	7.5	0.0882353			100	24	95.9583	4.15962	0.0805302	0.0193407
100	4	87	2	0.0229885			40	26	103.577	5.53983	0.559148	0.0418711
100	5	117	7	0.0598291			20	33	113.848	6.89465	0.68221	0.0458919
100	6	111	17	0.153153			0	23	120.739	7.27256	0.827874	0.0516632
100	7	94	8	0.0851064
100	8	112	23	0.205357
100	9	94	10	0.106383
100	10	88	3	0.0340909
100	11	82	0	0
100	13	143	2	0.013986
100	14	88	1	0.0113636
100	15	122	4	0.0327869
100	16	103	3	0.0291262
100	18	99	14	0.141414
100	19	78	9	0.115385
100	20	104	2	0.0192308
100	21	67	30	0.447761
100	22	85	7.5	0.0882353
100	23	68	5	0.0882353
100	26	90	0	0
100	27	78	6	0.0769231
100	28	139	0	0
40	1	103	71	0.68932
40	2	123	46	0.373984
40	3	131	32	0.244275
40	4	89	35	0.393258
40	5	135	110	0.814815
40	6	150	44	0.293333
40	8	74	57	0.77027
40	9	56	30	0.535714
40	10	127	80	0.629921
40	11	56	30	0.535714
40	12	74	57	0.77027
40	13	127	76	0.598425
40	14	97	54	0.556701
40	15	81	29	0.358025
40	16	71	43	0.605634
40	18	86	51	0.593023
40	19	107	2	0.0186916
40	20	105	64	0.609524
40	22	85	45	0.529412
40	23	107	61	0.570093
40	24	97	72	0.742268
40	25	90	35	0.388889
40	26	126	122	0.968254
40	27	163	144	0.883436
40	28	141	98	0.695035
40	29	92	34	0.369565
20	1	118	96	0.813559
20	2	138	0	0
20	3	65	38	0.584615
20	4	143	121	0.846154
20	5	139	124	0.892086
20	6	64	4	0.0625
20	7	109	83	0.761468
20	8	137	111	0.810219
20	9	125	87	0.696
20	10	152	92	0.605263
20	11	194	177	0.912371
20	13	93	87	0.935484
20	14	92	86	0.934783
20	15	112	75	0.669643
20	16	114	102	0.894737
20	17	79	9	0.113924
20	18	70	55	0.785714
20	19	129	84	0.651163
20	21	80	51	0.6375
20	22	138	93	0.673913
20	23	156	103	0.660256
20	24	33	3	0.0909091
20	25	80	61	0.7625
20	26	78	71	0.910256
20	27	118	76	0.644068
20	28	145	128	0.882759
20	29	105	61	0.580952
20	30	147	142	0.965986
20	31	78	71	0.910256
20	32	52	24	0.461538
20	33	158	117	0.740506
20	34	109	82	0.752294
20	35	207	180	0.869565
0	1	164	160	0.97561
0	2	131	109	0.832061
0	3	101	87	0.861386
0	5	140	134	0.957143
0	6	142	139	0.978873
0	7	73	60	0.821918
0	9	134	124	0.925373
0	10	139	132	0.94964
0	11	108	107	0.990741
0	12	153	150	0.980392
0	13	119	2	0.0168067
0	14	134	129	0.962687
0	15	85	81	0.952941
0	16	117	114	0.974359
0	17	115	113	0.982609
0	18	29	8	0.275862
0	19	172	161	0.936047
0	20	105	100	0.952381
0	21	137	87	0.635036
0	22	103	96	0.932039
0	23	174	134	0.770115
0	24	65	34	0.523077
0	25	137	117	0.854015

## Sheet: Fig. 2C
radiation (Gy)	nb of analysed testes	nb of TEP1 positive	percentage	standard deviation (%)
0	35	15	43	8.4
40	30	21	70	8.4

## Sheet: Fig. 2H
Conditions	nb of analysed testes	nb of TEP1 positive	percentage	standard deviation (%)
dsLacZ	20	17	85	8.6
7b	19	0	0	0
dsTEP1	18	0	0	0
dsLRIM1	16	0	0	0
dsHPX2	20	0	0	0

## Sheet: Fig. 2I
radiation (Gy)	Male adult age (day)	TEP1 status	nb of apoptotic bodies							Apoptotic bodies
0	1	control	3			radiation (Gy)	Male adult age (day)	TEP1 status	N	average	sem
0	1	control	1			0	1	control	22	1.22727	0.293743
0	1	control	0			0	1	depleted	28	11.6786	2.63224
0	1	control	0			40	1	control	36	15.9444	2.40005
0	1	control	1			40	3	control	31	7.09677	0.949652
0	1	control	0			40	1	depleted	33	24.4545	3.79046
0	1	control	3			40	3	depleted	30	22.6667	2.1963
0	1	control	3
0	1	control	4
0	1	control	0
0	1	control	0
0	1	control	0
0	1	control	3
0	1	control	2
0	1	control	0
0	1	control	0
0	1	control	1
0	1	control	1
0	1	control	0
0	1	control	3
0	1	control	2
0	1	control	0
0	1	depleted	0
0	1	depleted	4
0	1	depleted	0
0	1	depleted	4
0	1	depleted	2
0	1	depleted	11
0	1	depleted	5
0	1	depleted	1
0	1	depleted	6
0	1	depleted	0
0	1	depleted	3
0	1	depleted	6
0	1	depleted	10
0	1	depleted	35
0	1	depleted	37
0	1	depleted	52
0	1	depleted	7
0	1	depleted	4
0	1	depleted	33
0	1	depleted	8
0	1	depleted	0
0	1	depleted	10
0	1	depleted	27
0	1	depleted	32
0	1	depleted	8
0	1	depleted	14
0	1	depleted	0
0	1	depleted	8
40	1	control	3
40	1	control	28
40	1	control	39
40	1	control	8
40	1	control	26
40	1	control	8
40	1	control	3
40	1	control	8
40	1	control	10
40	1	control	11
40	1	control	13
40	1	control	6
40	1	control	5
40	1	control	34
40	1	control	42
40	1	control	63
40	1	control	24
40	1	control	17
40	1	control	11
40	1	control	39
40	1	control	8
40	1	control	22
40	1	control	26
40	1	control	3
40	1	control	5
40	1	control	24
40	1	control	4
40	1	control	13
40	1	control	7
40	1	control	10
40	1	control	3
40	1	control	0
40	1	control	32
40	1	control	7
40	1	control	1
40	1	control	11
40	3	control	2
40	3	control	10
40	3	control	8
40	3	control	6
40	3	control	3
40	3	control	17
40	3	control	15
40	3	control	10
40	3	control	1
40	3	control	11
40	3	control	9
40	3	control	5
40	3	control	2
40	3	control	6
40	3	control	12
40	3	control	5
40	3	control	11
40	3	control	18
40	3	control	5
40	3	control	3
40	3	control	15
40	3	control	14
40	3	control	0
40	3	control	7
40	3	control	0
40	3	control	5
40	3	control	2
40	3	control	6
40	3	control	1
40	3	control	0
40	1	depleted	12
40	1	depleted	11
40	1	depleted	0
40	1	depleted	15
40	1	depleted	30
40	1	depleted	9
40	1	depleted	16
40	1	depleted	14
40	1	depleted	34
40	1	depleted	61
40	1	depleted	23
40	1	depleted	84
40	1	depleted	17
40	1	depleted	14
40	1	depleted	10
40	1	depleted	15
40	1	depleted	10
40	1	depleted	19
40	1	depleted	8
40	1	depleted	15
40	1	depleted	14
40	1	depleted	34
40	1	depleted	61
40	1	depleted	23
40	1	depleted	84
40	1	depleted	65
40	1	depleted	15
40	1	depleted	12
40	1	depleted	10
40	1	depleted	3
40	1	depleted	26
40	1	depleted	22
40	1	depleted	21
40	3	depleted	17
40	3	depleted	36
40	3	depleted	13
40	3	depleted	37
40	3	depleted	15
40	3	depleted	16
40	3	depleted	32
40	3	depleted	23
40	3	depleted	13
40	3	depleted	19
40	3	depleted	35
40	3	depleted	24
40	3	depleted	12
40	3	depleted	55
40	3	depleted	8
40	3	depleted	12
40	3	depleted	18
40	3	depleted	33
40	3	depleted	15
40	3	depleted	54
40	3	depleted	25
40	3	depleted	8
40	3	depleted	13
40	3	depleted	21
40	3	depleted	22
40	3	depleted	33
40	3	depleted	15
40	3	depleted	13
40	3	depleted	21
40	3	depleted	22

## Sheet: Fig. 3A
line	radiation	experiment	cage	sample id	egg nb	larvae nb	H rt
7b	0	1	1	1	142	92	0.647887						egg nb		hatching rate (%)
7b	0	1	1	2	117	110	0.940171			line	radiation	N	average	sem	average	sem
7b	0	1	1	3	130	7	0.0538462			7b	0	48	130.562	5.70546	0.803082	0.0378357
7b	0	1	1	4	77	48	0.623377				40	32	131	8.46042	0.320071	0.0472951
7b	0	1	1	5	196	188	0.959184			T4	0	46	123.065	4.70958	0.828003	0.0359616
7b	0	1	1	6	165	151	0.915152				40	52	123.442	4.59099	0.56052	0.0294437
7b	0	1	1	7	100	95	0.95
7b	0	1	1	8	184	162	0.880435
7b	0	1	2	1	179	173	0.96648
7b	0	1	2	2	97	78	0.804124
7b	0	1	2	3	97	95	0.979381
7b	0	1	2	4	90	86	0.955556
7b	0	1	2	5	144	94	0.652778
7b	0	1	2	6	116	109	0.939655
7b	0	1	2	7	126	5	0.0396825
7b	0	1	2	8	78	48	0.615385
7b	0	1	2	9	193	185	0.958549
7b	0	1	2	10	166	153	0.921687
7b	0	1	2	11	90	85	0.944444
7b	0	1	2	12	180	158	0.877778
7b	0	1	2	13	178	173	0.97191
7b	0	1	2	14	97	77	0.793814
7b	0	2	1	1	99	95	0.959596
7b	0	2	1	2	97	95	0.979381
7b	0	2	1	3	140	90	0.642857
7b	0	2	1	4	117	111	0.948718
7b	0	2	1	5	126	2	0.015873
7b	0	2	1	6	76	48	0.631579
7b	0	2	1	7	195	183	0.938462
7b	0	2	1	8	163	149	0.91411
7b	0	2	1	9	90	82	0.911111
7b	0	2	1	10	179	157	0.877095
7b	0	2	1	11	180	175	0.972222
7b	0	2	2	1	97	79	0.814433
7b	0	2	2	2	99	90	0.909091
7b	0	2	2	3	97	95	0.979381
7b	0	2	2	4	142	92	0.647887
7b	0	2	2	5	118	110	0.932203
7b	0	2	2	6	128	4	0.03125
7b	0	2	2	7	77	48	0.623377
7b	0	2	2	8	196	188	0.959184
7b	0	2	2	9	166	152	0.915663
7b	0	2	2	10	90	83	0.922222
7b	0	2	2	11	183	162	0.885246
7b	0	2	2	12	178	173	0.97191
7b	0	2	2	13	97	77	0.793814
7b	0	2	2	14	100	98	0.98
7b	0	2	2	15	95	95	1
7b	40	1	1	1	66	22	0.333333
7b	40	1	1	2	144	19	0.131944
7b	40	1	1	3	177	92	0.519774
7b	40	1	1	4	115	4	0.0347826
7b	40	1	1	5	108	1	0.00925926
7b	40	1	1	6	150	112	0.746667
7b	40	1	1	7	110	72	0.654545
7b	40	1	2	1	30	10	0.333333
7b	40	1	2	2	131	47	0.358779
7b	40	1	2	3	55	11	0.2
7b	40	1	2	4	202	2	0.00990099
7b	40	1	2	5	163	109	0.668712
7b	40	1	2	6	152	78	0.513158
7b	40	1	2	7	135	2	0.0148148
7b	40	1	2	8	172	0	0
7b	40	1	2	9	191	119	0.623037
7b	40	2	1	1	66	22	0.333333
7b	40	2	1	2	144	19	0.131944
7b	40	2	1	3	174	89	0.511494
7b	40	2	1	4	115	3	0.026087
7b	40	2	1	5	109	0	0
7b	40	2	1	6	149	111	0.744966
7b	40	2	1	7	109	70	0.642202
7b	40	2	2	1	30	10	0.333333
7b	40	2	2	2	129	45	0.348837
7b	40	2	2	3	55	11	0.2
7b	40	2	2	4	200	1	0.005
7b	40	2	2	5	164	110	0.670732
7b	40	2	2	6	150	76	0.506667
7b	40	2	2	7	136	1	0.00735294
7b	40	2	2	8	170	0	0
7b	40	2	2	9	191	120	0.628272
T4	0	1	1	1	164	160	0.97561
T4	0	1	1	2	131	109	0.832061
T4	0	1	1	3	101	87	0.861386
T4	0	1	1	4	140	134	0.957143
T4	0	1	1	5	146	140	0.958904
T4	0	1	1	6	73	60	0.821918
T4	0	1	1	7	134	124	0.925373
T4	0	1	1	8	139	132	0.94964
T4	0	1	1	9	108	107	0.990741
T4	0	1	1	10	153	150	0.980392
T4	0	1	1	11	119	3	0.0252101
T4	0	1	1	12	136	131	0.963235
T4	0	1	2	1	85	81	0.952941
T4	0	1	2	2	117	114	0.974359
T4	0	1	2	3	115	113	0.982609
T4	0	1	2	4	29	8	0.275862
T4	0	1	2	5	172	162	0.94186
T4	0	1	2	6	105	100	0.952381
T4	0	1	2	7	137	87	0.635036
T4	0	1	2	8	103	96	0.932039
T4	0	2	1	1	174	135	0.775862
T4	0	2	1	2	130	68	0.523077
T4	0	2	1	3	137	117	0.854015
T4	0	2	1	4	164	161	0.981707
T4	0	2	1	5	133	111	0.834586
T4	0	2	1	6	102	88	0.862745
T4	0	2	1	7	141	135	0.957447
T4	0	2	1	8	142	139	0.978873
T4	0	2	1	9	73	61	0.835616
T4	0	2	1	10	132	122	0.924242
T4	0	2	2	1	139	133	0.956835
T4	0	2	2	2	110	107	0.972727
T4	0	2	2	3	151	148	0.980132
T4	0	2	2	4	120	2	0.0166667
T4	0	2	2	5	134	129	0.962687
T4	0	2	2	6	85	80	0.941176
T4	0	2	2	7	117	114	0.974359
T4	0	2	2	8	115	114	0.991304
T4	0	2	2	9	58	16	0.275862
T4	0	2	2	10	173	161	0.930636
T4	0	2	2	11	106	101	0.95283
T4	0	2	2	12	137	88	0.642336
T4	0	2	2	13	104	97	0.932692
T4	0	2	2	14	174	134	0.770115
T4	0	2	2	15	65	34	0.523077
T4	0	2	2	16	138	117	0.847826
T4	40	1	1	1	206	142	0.68932
T4	40	1	1	2	123	47	0.382114
T4	40	1	1	3	131	32	0.244275
T4	40	1	1	4	89	35	0.393258
T4	40	1	1	5	136	111	0.816176
T4	40	1	1	6	150	44	0.293333
T4	40	1	1	7	144	114	0.791667
T4	40	1	1	8	148	112	0.756757
T4	40	1	1	9	128	80	0.625
T4	40	1	1	10	112	61	0.544643
T4	40	1	1	11	56	30	0.535714
T4	40	1	1	12	127	76	0.598425
T4	40	1	1	13	97	54	0.556701
T4	40	1	1	14	81	29	0.358025
T4	40	1	1	15	142	86	0.605634
T4	40	1	2	1	86	51	0.593023
T4	40	1	2	2	107	1	0.00934579
T4	40	1	2	3	105	65	0.619048
T4	40	1	2	4	85	45	0.529412
T4	40	1	2	5	107	63	0.588785
T4	40	1	2	6	97	73	0.752577
T4	40	1	2	7	180	70	0.388889
T4	40	1	2	8	126	123	0.97619
T4	40	1	2	9	163	144	0.883436
T4	40	1	2	10	141	98	0.695035
T4	40	1	2	11	92	34	0.369565
T4	40	2	1	1	102	70	0.686275
T4	40	2	1	2	123	46	0.373984
T4	40	2	1	3	129	30	0.232558
T4	40	2	1	4	190	72	0.378947
T4	40	2	1	5	135	110	0.814815
T4	40	2	1	6	153	47	0.30719
T4	40	2	1	7	74	58	0.783784
T4	40	2	1	8	148	114	0.77027
T4	40	2	1	9	127	80	0.629921
T4	40	2	1	10	112	60	0.535714
T4	40	2	1	11	56	30	0.535714
T4	40	2	1	12	128	77	0.601562
T4	40	2	1	13	97	53	0.546392
T4	40	2	1	14	162	60	0.37037
T4	40	2	1	15	142	86	0.605634
T4	40	2	1	16	174	100	0.574713
T4	40	2	2	1	107	4	0.0373832
T4	40	2	2	2	105	66	0.628571
T4	40	2	2	3	86	44	0.511628
T4	40	2	2	4	107	61	0.570093
T4	40	2	2	5	97	72	0.742268
T4	40	2	2	6	180	70	0.388889
T4	40	2	2	7	126	122	0.968254
T4	40	2	2	8	165	146	0.884848
T4	40	2	2	9	141	100	0.70922
T4	40	2	2	10	94	34	0.361702

## Sheet: Fig. 3B
Heterozygotes	nb of apoptotic bodies						apoptotic bodies
S1/S1	0				Heterozygotes	N	average	sem
S1/S1	57				S1/S1	24	27.5417	5.24196
S1/S1	9				S2/S2	28	8.57143	2.57811
S1/S1	40				R1/R1	25	28.84	5.1938
S1/S1	5
S1/S1	15
S1/S1	57
S1/S1	47
S1/S1	6
S1/S1	0
S1/S1	33
S1/S1	6
S1/S1	21
S1/S1	12
S1/S1	45
S1/S1	31
S1/S1	10
S1/S1	7
S1/S1	35
S1/S1	30
S1/S1	32
S1/S1	32
S1/S1	15
S1/S1	116
S2/S2	7
S2/S2	4
S2/S2	6
S2/S2	3
S2/S2	2
S2/S2	0
S2/S2	3
S2/S2	0
S2/S2	12
S2/S2	4
S2/S2	11
S2/S2	4
S2/S2	5
S2/S2	47
S2/S2	36
S2/S2	2
S2/S2	0
S2/S2	0
S2/S2	1
S2/S2	2
S2/S2	0
S2/S2	10
S2/S2	0
S2/S2	0
S2/S2	51
S2/S2	5
S2/S2	6
S2/S2	19
R1/R1	7
R1/R1	69
R1/R1	8
R1/R1	44
R1/R1	18
R1/R1	6
R1/R1	21
R1/R1	0
R1/R1	21
R1/R1	38
R1/R1	2
R1/R1	68
R1/R1	66
R1/R1	8
R1/R1	2
R1/R1	24
R1/R1	14
R1/R1	55
R1/R1	15
R1/R1	20
R1/R1	22
R1/R1	16
R1/R1	56
R1/R1	23
R1/R1	98

## Sheet: Fig. 3C
heterozygote	radiation	Experiment	cage	number	egg nb	larvae nb	hatching rate
R1	0	1	1	1	238	200	0.840336						egg nb		hatching rate (%)
R1	0	1	1	2	197	188	0.954315			heterozygote	radiation	N	average	sem	average	sem
R1	0	1	1	3	100	98	0.98			S1/S1	0	39	129.385	7.22378	0.710522	0.0532262
R1	0	1	1	4	181	178	0.983425			S2/S2	0	37	128	6.73334	0.718388	0.0430034
R1	0	1	1	5	131	128	0.977099			R1/R1	0	35	125.743	7.86358	0.773005	0.0538901
R1	0	1	1	6	136	123	0.904412			S1/S1	40	52	132.154	7.87503	0.350496	0.0399058
R1	0	1	1	7	180	122	0.677778			S2/S2	40	33	123.455	9.53354	0.574894	0.0463776
R1	0	1	1	8	112	1	0.00892857			R1/R1	40	48	128.75	7.98922	0.384524	0.0445485
R1	0	1	1	9	203	180	0.8867
R1	0	1	2	1	168	127	0.755952
R1	0	1	2	2	86	85	0.988372
R1	0	1	2	3	100	99	0.99
R1	0	1	2	4	111	109	0.981982
R1	0	1	2	5	108	107	0.990741
R1	0	1	2	6	92	90	0.978261
R1	0	1	2	7	179	148	0.826816
R1	0	1	2	8	179	170	0.949721
R1	0	2	1	1	169	132	0.781065
R1	0	2	1	2	138	125	0.905797
R1	0	2	1	3	44	32	0.727273
R1	0	2	1	4	87	76	0.873563
R1	0	2	1	5	53	45	0.849057
R1	0	2	1	6	119	101	0.848739
R1	0	2	2	1	73	70	0.958904
R1	0	2	2	2	51	3	0.0588235
R1	0	2	2	3	120	92	0.766667
R1	0	2	2	4	111	107	0.963964
R1	0	2	2	5	121	120	0.991736
R1	0	2	2	6	81	0	0
R1	0	2	2	7	151	135	0.89404
R1	0	2	2	8	167	7	0.0419162
R1	0	2	2	9	128	110	0.859375
R1	0	2	2	10	82	3	0.0365854
R1	0	2	2	11	108	100	0.925926
R1	0	2	2	12	97	87	0.896907
R1	40	1	1	1	66	0	0
R1	40	1	1	2	146	0	0
R1	40	1	1	3	204	67	0.328431
R1	40	1	1	4	200	121	0.605
R1	40	1	1	5	212	114	0.537736
R1	40	1	1	6	176	113	0.642045
R1	40	1	1	7	174	10	0.0574713
R1	40	1	1	8	190	98	0.515789
R1	40	1	1	9	69	25	0.362319
R1	40	1	1	10	173	25	0.144509
R1	40	1	1	11	97	2	0.0206186
R1	40	1	1	12	189	92	0.486772
R1	40	1	2	1	205	105	0.512195
R1	40	1	2	2	168	86	0.511905
R1	40	1	2	3	65	1	0.0153846
R1	40	1	2	4	141	77	0.546099
R1	40	1	2	5	137	6	0.0437956
R1	40	1	2	6	92	0	0
R1	40	1	2	7	96	6	0.0625
R1	40	1	2	8	75	43	0.573333
R1	40	1	2	9	45	2	0.0444444
R1	40	2	1	1	76	10	0.131579
R1	40	2	1	2	122	7	0.057377
R1	40	2	1	3	100	89	0.89
R1	40	2	1	4	67	1	0.0149254
R1	40	2	1	5	145	100	0.689655
R1	40	2	1	6	204	68	0.333333
R1	40	2	1	7	201	123	0.61194
R1	40	2	1	8	211	113	0.535545
R1	40	2	1	9	173	111	0.641618
R1	40	2	1	10	172	11	0.0639535
R1	40	2	1	11	191	98	0.513089
R1	40	2	1	12	71	27	0.380282
R1	40	2	1	13	140	123	0.878571
R1	40	2	1	14	98	3	0.0306122
R1	40	2	1	15	190	92	0.484211
R1	40	2	1	16	150	104	0.693333
R1	40	2	1	17	166	85	0.512048
R1	40	2	2	1	35	2	0.0571429
R1	40	2	2	2	100	75	0.75
R1	40	2	2	3	138	8	0.057971
R1	40	2	2	4	45	35	0.777778
R1	40	2	2	5	97	77	0.793814
R1	40	2	2	6	74	44	0.594595
R1	40	2	2	7	45	43	0.955556
R1	40	2	2	8	75	70	0.933333
R1	40	2	2	9	124	8	0.0645161
R1	40	2	2	10	50	0	0
S1	0	1	1	1	110	100	0.909091
S1	0	1	1	2	124	122	0.983871
S1	0	1	1	3	116	115	0.991379
S1	0	1	1	4	112	88	0.785714
S1	0	1	1	5	112	93	0.830357
S1	0	1	1	6	156	146	0.935897
S1	0	1	1	7	159	110	0.691824
S1	0	1	1	8	123	100	0.813008
S1	0	1	1	9	121	111	0.917355
S1	0	1	1	10	74	25	0.337838
S1	0	1	2	1	113	104	0.920354
S1	0	1	2	2	133	132	0.992481
S1	0	1	2	3	84	83	0.988095
S1	0	1	2	4	167	163	0.976048
S1	0	1	2	5	88	87	0.988636
S1	0	1	2	6	105	103	0.980952
S1	0	1	2	7	197	157	0.796954
S1	0	1	2	8	92	58	0.630435
S1	0	2	1	1	172	155	0.901163
S1	0	2	1	2	100	22	0.22
S1	0	2	1	3	93	92	0.989247
S1	0	2	1	4	121	118	0.975207
S1	0	2	1	5	119	114	0.957983
S1	0	2	1	6	92	3	0.0326087
S1	0	2	1	7	107	100	0.934579
S1	0	2	1	8	90	0	0
S1	0	2	1	9	166	0	0
S1	0	2	1	10	164	78	0.47561
S1	0	2	1	11	123	100	0.813008
S1	0	2	1	12	54	0	0
S1	0	2	1	13	86	82	0.953488
S1	0	2	2	1	181	115	0.635359
S1	0	2	2	2	207	200	0.966184
S1	0	2	2	3	212	172	0.811321
S1	0	2	2	4	200	116	0.58
S1	0	2	2	5	100	70	0.7
S1	0	2	2	6	219	194	0.885845
S1	0	2	2	7	49	4	0.0816327
S1	0	2	2	8	205	67	0.326829
S1	40	1	1	1	157	57	0.363057
S1	40	1	1	2	175	82	0.468571
S1	40	1	1	3	134	62	0.462687
S1	40	1	1	4	163	20	0.122699
S1	40	1	1	5	51	21	0.411765
S1	40	1	1	6	131	11	0.0839695
S1	40	1	1	7	242	2	0.00826446
S1	40	1	1	8	182	55	0.302198
S1	40	1	1	9	143	10	0.0699301
S1	40	1	1	10	191	7	0.0366492
S1	40	1	1	11	256	83	0.324219
S1	40	1	2	1	129	21	0.162791
S1	40	1	2	2	106	0	0
S1	40	1	2	3	103	32	0.31068
S1	40	1	2	4	87	0	0
S1	40	1	2	5	76	2	0.0263158
S1	40	1	2	6	171	120	0.701754
S1	40	1	2	7	83	5	0.060241
S1	40	1	2	8	9	0	0
S1	40	1	2	9	141	80	0.567376
S1	40	1	2	10	107	79	0.738318
S1	40	1	2	11	88	78	0.886364
S1	40	1	2	12	117	61	0.521368
S1	40	1	2	13	188	90	0.478723
S1	40	1	2	14	151	44	0.291391
S1	40	1	2	15	52	34	0.653846
S1	40	2	1	1	160	103	0.64375
S1	40	2	1	2	172	81	0.47093
S1	40	2	1	3	134	63	0.470149
S1	40	2	1	4	161	20	0.124224
S1	40	2	1	5	53	23	0.433962
S1	40	2	1	6	129	10	0.0775194
S1	40	2	1	7	243	4	0.0164609
S1	40	2	1	8	182	156	0.857143
S1	40	2	1	9	143	11	0.0769231
S1	40	2	1	10	192	167	0.869792
S1	40	2	1	11	257	85	0.330739
S1	40	2	1	12	130	22	0.169231
S1	40	2	1	13	105	0	0
S1	40	2	1	14	102	33	0.323529
S1	40	2	1	15	85	78	0.917647
S1	40	2	2	1	76	1	0.0131579
S1	40	2	2	2	175	122	0.697143
S1	40	2	2	3	83	7	0.0843373
S1	40	2	2	4	9	5	0.555556
S1	40	2	2	5	141	122	0.865248
S1	40	2	2	6	108	80	0.740741
S1	40	2	2	7	86	0	0
S1	40	2	2	8	117	62	0.529915
S1	40	2	2	9	189	91	0.481481
S1	40	2	2	10	151	45	0.298013
S1	40	2	2	11	56	7	0.125
S2	0	1	1	1	153	136	0.888889
S2	0	1	1	2	16	13	0.8125
S2	0	1	1	3	161	63	0.391304
S2	0	1	1	4	127	108	0.850394
S2	0	1	1	5	155	100	0.645161
S2	0	1	1	6	115	102	0.886957
S2	0	1	1	7	117	78	0.666667
S2	0	1	1	8	125	94	0.752
S2	0	1	1	9	107	78	0.728972
S2	0	1	2	1	138	135	0.978261
S2	0	1	2	2	125	124	0.992
S2	0	1	2	3	94	67	0.712766
S2	0	1	2	4	122	101	0.827869
S2	0	1	2	5	72	62	0.861111
S2	0	1	2	6	168	16	0.0952381
S2	0	1	2	7	105	82	0.780952
S2	0	1	2	8	90	89	0.988889
S2	0	1	2	9	127	125	0.984252
S2	0	1	2	10	137	22	0.160584
S2	0	2	1	1	134	130	0.970149
S2	0	2	1	2	65	65	1
S2	0	2	1	3	132	120	0.909091
S2	0	2	1	4	134	78	0.58209
S2	0	2	1	5	108	7	0.0648148
S2	0	2	1	6	165	98	0.593939
S2	0	2	1	7	141	100	0.70922
S2	0	2	1	8	119	98	0.823529
S2	0	2	1	9	88	75	0.852273
S2	0	2	1	10	103	76	0.737864
S2	0	2	1	11	91	4	0.043956
S2	0	2	1	12	80	55	0.6875
S2	0	2	2	1	183	120	0.655738
S2	0	2	2	2	185	162	0.875676
S2	0	2	2	3	149	113	0.758389
S2	0	2	2	4	178	97	0.544944
S2	0	2	2	5	233	211	0.905579
S2	0	2	2	6	194	167	0.860825
S2	40	1	1	1	194	155	0.798969
S2	40	1	1	2	32	20	0.625
S2	40	1	1	3	1	0	0
S2	40	1	1	4	241	18	0.0746888
S2	40	1	1	5	147	111	0.755102
S2	40	1	1	6	180	167	0.927778
S2	40	1	1	7	186	17	0.0913978
S2	40	1	1	8	81	59	0.728395
S2	40	1	2	1	71	59	0.830986
S2	40	1	2	2	100	70	0.7
S2	40	1	2	3	156	58	0.371795
S2	40	1	2	4	74	39	0.527027
S2	40	1	2	5	200	72	0.36
S2	40	1	2	6	176	160	0.909091
S2	40	1	2	7	162	9	0.0555556
S2	40	1	2	8	100	56	0.56
S2	40	1	2	9	126	56	0.444444
S2	40	1	2	10	100	78	0.78
S2	40	1	2	11	101	24	0.237624
S2	40	2	1	1	230	136	0.591304
S2	40	2	1	2	160	141	0.88125
S2	40	2	1	3	120	78	0.65
S2	40	2	1	4	118	71	0.601695
S2	40	2	1	5	109	85	0.779817
S2	40	2	1	6	87	76	0.873563
S2	40	2	1	7	135	90	0.666667
S2	40	2	1	8	71	23	0.323944
S2	40	2	1	9	114	103	0.903509
S2	40	2	1	10	108	78	0.722222
S2	40	2	2	1	75	48	0.64
S2	40	2	2	2	58	22	0.37931
S2	40	2	2	3	159	77	0.484277
S2	40	2	2	4	102	71	0.696078

## Sheet: Fig. 3D
Genetic status	cage	sample id	egg nb	larvae nb	hatching rate
7b; S1	1	1	202	122	0.60396					egg		Hatching rate (%)
7b; S1	1	2	127	102	0.80315			Genetic status	N	average	sem	average	sem
7b; S1	1	3	196	24	0.122449			7b; S1	32	170.469	6.91189	0.409122	0.120161
7b; S1	1	4	177	0	0			7b; S2	29	173.3	7.25879	0.445946	0.119425
7b; S1	1	5	117	0	0			7b; R1	31	174.323	7.24077	0.505451	0.118982
7b; S1	1	6	190	85	0.447368
7b; S1	1	7	166	75	0.451807
7b; S1	1	8	160	87	0.54375
7b; S1	1	9	194	92	0.474227
7b; S1	1	10	222	179	0.806306
7b; S1	1	11	174	3	0.0172414
7b; S1	1	12	223	162	0.726457
7b; S1	1	13	177	149	0.841808
7b; S1	1	14	161	4	0.0248447
7b; S1	1	15	183	121	0.661202
7b; S1	1	16	69	6	0.0869565
7b; S1	1	17	202	124	0.613861
7b; S1	1	18	129	105	0.813953
7b; S1	1	19	190	82	0.431579
7b; S1	2	1	197	26	0.13198
7b; S1	2	2	150	45	0.3
7b; S1	2	3	167	0	0
7b; S1	2	4	119	0	0
7b; S1	2	5	158	84	0.531646
7b; S1	2	6	194	94	0.484536
7b; S1	2	7	224	181	0.808036
7b; S1	2	8	174	5	0.0287356
7b; S1	2	9	223	160	0.717489
7b; S1	2	10	180	151	0.838889
7b; S1	2	11	159	3	0.0188679
7b; S1	2	12	182	120	0.659341
7b; S1	2	13	69	7	0.101449
7b; S2	1	1	182	113	0.620879
7b; S2	1	2	171	162	0.947368
7b; S2	1	3	208	115	0.552885
7b; S2	1	4	37	0	0
7b; S2	1	5	122	92	0.754098
7b; S2	1	6	141	0	0
7b; S2	1	7	171	60	0.350877
7b; S2	1	8	142	139	0.978873
7b; S2	1	9	201	99	0.492537
7b; S2	1	10	210	110	0.52381
7b; S2	1	11	189	67	0.354497
7b; S2	1	12	110	99	0.9
7b; S2	1	13	199	46	0.231156
7b; S2	1	14	170	56	0.329412
7b; S2	2	1	145	1	0.00689655
7b; S2	2	2	157	0	0
7b; S2	2	3	222	163	0.734234
7b; S2	2	4	158	0	0
7b; S2	2	5	220	147	0.668182
7b; S2	2	6	196	180	0.918367
7b; S2	2	7	213	136	0.638498
7b; S2	2	8	216	89	0.412037
7b; S2	2	9	161	0	0
7b; S2	2	10	191	55	0.287958
7b; S2	2	11	200	97	0.485
7b; S2	2	12	162	120	0.740741
7b; S2	2	13	157	127	0.808917
7b; S2	2	14	196	59	0.30102
7b; S2	2	15	197	6	0.0304569
7b; S2	2	16	155	48	0.309677
7b; R1	1	1	199	135	0.678392
7b; R1	1	2	161	37	0.229814
7b; R1	1	3	221	200	0.904977
7b; R1	1	4	210	134	0.638095
7b; R1	1	5	178	120	0.674157
7b; R1	1	6	179	75	0.418994
7b; R1	1	7	102	0	0
7b; R1	1	8	234	92	0.393162
7b; R1	1	9	192	0	0
7b; R1	1	10	99	1	0.010101
7b; R1	1	11	184	133	0.722826
7b; R1	1	12	184	126	0.684783
7b; R1	1	13	147	140	0.952381
7b; R1	1	14	157	3	0.0191083
7b; R1	2	1	203	154	0.758621
7b; R1	2	2	212	154	0.726415
7b; R1	2	3	209	102	0.488038
7b; R1	2	4	201	134	0.666667
7b; R1	2	5	162	40	0.246914
7b; R1	2	6	210	132	0.628571
7b; R1	2	7	178	77	0.432584
7b; R1	2	8	102	5	0.0490196
7b; R1	2	9	125	95	0.76
7b; R1	2	10	190	0	0
7b; R1	2	11	184	135	0.733696
7b; R1	2	12	184	127	0.690217
7b; R1	2	13	150	142	0.946667
7b; R1	2	14	64	0	0
7b; R1	2	15	207	170	0.821256
7b; R1	2	16	171	109	0.637427
7b; R1	2	17	205	155	0.756098

[truncated: 5 more sheets: Fig. 4A, Fig. 4B, Fig. 4C, Fig. 4D, S7 Fig.]
